# 1 **Reconstructing the first COVID-19 pandemic wave with minimal data in the UK**

2

3 Siyu Chen<sup>1\*</sup>, Jennifer A Flegg<sup>2</sup>, Katrina A Lythgoe<sup>1,3</sup>, Lisa J White<sup>3\*</sup>

4

5 <sup>1</sup>Big Data Institute, Li Ka Shing Centre for Health Information and Discovery, Nuffield

6 Department of Medicine, University of Oxford, United Kingdom

7 <sup>2</sup>School of Mathematics and Statistics, University of Melbourne, Melbourne, Australia

8 <sup>3</sup>Department of Biology, University of Oxford, United Kingdom

9

10 \*Corresponding authors: [siyu.chen@ndm.ox.ac.uk](mailto:siyu.chen@ndm.ox.ac.uk) ; [lisa.white@biology.ox.ac.uk](mailto:lisa.white@biology.ox.ac.uk)

11

## 12 **Abstract**

13 Accurate measurement of exposure to SARS-CoV-2 in the population is crucial for  
14 understanding the dynamics of disease transmission and evaluating the impacts of  
15 interventions. However, it is particularly challenging to achieve this in the early phase of a  
16 pandemic because of the sparsity of epidemiological data. In our previous publication[1], we  
17 developed an early pandemic diagnostic tool that can link minimum datasets:  
18 seroprevalence, mortality and infection testing data to estimate the true exposure in  
19 different regions of England and found levels of SARS-CoV-2 population exposure are  
20 considerably higher than suggested by seroprevalence surveys. Here, we re-examined and  
21 evaluated the model in the context of reconstructing the first COVID-19 epidemic wave in  
22 England from three perspectives: validation from ONS Coronavirus Infection Survey,  
23 relationship between model performance and data abundance and time-varying case  
24 detection rate. We found that our model can recover the first but unobserved epidemic  
25 wave of COVID-19 in England from March 2020 to June 2020 as long as two or three  
26 serological measurements are given as model inputs additionally, with the second wave  
27 during winter of 2020 validated by the estimates from ONS Coronavirus Infection Survey.  
28 Moreover, the model estimated that by the end of October in 2020 the UK government's  
29 official COVID-9 online dashboard reported COVID-19 cases only accounted for 9.1% (95%CrI  
30 (8.7%,9.8%)) of cumulative exposure, dramatically varying across two epidemic waves in  
31 England in 2020 (4.3% (95%CrI (4.1%, 4.6%)) vs 43.7% (95%CrI (40.7%, 47.3%))).

32 **NOTE: This preprint reports new research that has not been certified by peer review and should not be used to guide clinical practice.**

33

## 34 **Introduction**

35 The COVID-19 pandemic has inflicted devastating effects on global populations and  
36 economies [2, 3] and now still affecting countries in many different ways. Reviewing the  
37 challenges posted by the COVID-19 pandemic and evaluating previous responses is vital  
38 important for future pandemic preparedness [4-7]. Accurate estimation of exposure  
39 remains crucial for understanding the dynamics of disease transmission and assessing the  
40 impacts of interventions along different stages of pandemic. However, this is particularly  
41 challenging in the early phase since most of the characteristics of the pathogen are  
42 unknown and at the same time epidemiological data are sparse.

43 Confirmed COVID-19 cases was typically the first type of data to be collected and reported  
44 mostly due to the syndrome surveillance systems [8, 9]. However, it usually underestimates  
45 the true exposure in the population because of the limited capacity of diagnoses, the  
46 unsolid definition of cases, testing criteria and etc. Large-scale viral infection survey in the  
47 community can help to solve the testing issue. For example, the UK Office for National  
48 Statistics (ONS) conducted a national wide COVID-19 viral testing survey, namely Covid  
49 Infection Survey (CIS) [10] that successfully tracked the trajectories of COVID-19 infections in  
50 the community of UK since April of 2020. Because of its representative sampling across  
51 households in the general population this study is recognised to have a strong power to  
52 capture asymptomatic infections which might be missed out by symptomatic testing scheme  
53 in the early pandemic and can provide reliable estimates of prevalence over time [11].

54 However, this study started collecting samples from April of 2020 and then reporting the  
55 estimates of daily incidence from May of 2020 while the first death due to COVID-19 disease  
56 in the UK was documented in February 2020 [12]. This implies that the transmission of  
57 COVID-19 in the community began earlier than the survey, and the survey might not be able  
58 to recover the early epidemic curve.

59 Serologic studies that measure how many people have antibodies against the virus are a  
60 promising tool for pinning down the stage of the pandemic because of its ability of capturing  
61 past infections regardless of clinical symptoms [13]. If the antibody elicited by the virus lasts  
62 for lifetime, representative sampling in a population followed by the antibody testing will  
63 provide robust estimates of exposure. However, cohort studies following individuals over  
64 time after they've had a known COVID-19 infection were able to determine that antibodies

65 are only measurable up to 6–9 months [14-16], on average, varying across testing assay [17]  
66 and antigen types [18]. The immediate implication is that serological studies will inevitably  
67 under-estimate the number of people exposed, since some will have a lower antibody count  
68 when the study is conducted and test negative. Linking multiple publicly available datasets,  
69 we proposed a method that have been published previously [1] to estimate the true level of  
70 exposure after considering the antibody decay. Here we further examined and evaluated  
71 the model in the context of reconstructing the first COVID-19 pandemic from three  
72 perspectives: validation from ONS Infection Survey, relationship between model  
73 performance and data abundance and time-varying case detection rate.

74

## 75 **Result**

### 76 **Reconstruction of the early epidemic**

77 In our previous paper, we presented a simple model to link together three key metrics for  
78 evaluating the progress of an epidemic, applied to the context of SARS-CoV-2 in England:  
79 antibody seropositivity, infection incidence and number of deaths. We use these three  
80 metrics to estimate the antibody seroreversion rate and region-specific infection fatality  
81 ratios. In doing so, the cumulative number of infections in England are estimated, showing  
82 that cross-sectional seroprevalence data underestimate the true extent of the SARS-CoV-2  
83 epidemic in England in the early pandemic. Estimates for the IgG (spike) seroreversion rate  
84 and IFR are broadly consistent with other studies, which supports the validity of these  
85 findings.

86 The model was set up based on the important observation about the COVID-19 infection  
87 timeline that seroconversion in individuals who survive occurs at approximately the same  
88 time as death for those who do not. Therefore, a simple ordinary differential equation (ODE)  
89 was formulated to model the rate of change in the number of seropositive individuals in  
90 different regions of England which will increase as new infections were generated that was  
91 calculated by the daily number of deaths dividing by infection fatality ratio and will decrease  
92 as antibody decay. The model predicted seropositive population were fitted to observed  
93 seroprevalence using a Bayesian observation model.

### 94 **Validation from ONS Infection Survey**

95 Comparing the incidence of SARS-CoV-2 in England estimated by our model with those  
96 inferred by ONS Coronavirus Infection Survey (Figure 1), we found that our model could

97 reveal the first but unobserved epidemic wave of COVID-19 in England from March 2020 to  
98 June 2020 additionally, with the second wave validated by the estimates from ONS Infection  
99 Survey. Further, we found our model results were highly consistent with those using SEIRS  
100 type compartmental models with time-varying force of infection [19, 20].

101

## 102 **Relationship between model performance and data abundance**

103 We then examined the relationship between model performance and data abundance - how  
104 estimates of exposure from our model change with more serological data points being  
105 added into the fitting procedure one by one over time (Figure 2). We found a highly robust  
106 pattern of exposure across different regions of England was estimated in general.

107 Specifically, the model could only start estimating the interested quantities: exposure and  
108 two parameters (infection fatality ratio and antibody decaying rate) when at least two  
109 serological measurements from April to June 2020 in each region were given as inputs.  
110 However, these estimates were already highly consistent with those when more serological  
111 measurements were added although the credible bands were wider. The wide credible  
112 bands suggested a bigger uncertainty around the estimates when little information was  
113 available. When three serological measurements in each of region were included the  
114 estimates of exposure level became largely consistent at the results when all serological  
115 measurements were used. This might be attributed to the timing of these third serological  
116 measurements since then the seroprevalence in most regions started decreasing. With  
117 more and more serological measurements being added, the credible bands of estimates of  
118 exposure gradually narrowed.

119

## 120 **Time-varying case detection rate**

121 While comparing the reported cases with the incidence estimated by our model (Figure 3),  
122 we found the UK government's official COVID-9 online dashboard  
123 (<https://coronavirus.data.gov.uk>) reported COVID-19 cases in England only accounted for  
124 9.1% (95%CrI (8.7%,9.8%)) of cumulative exposure by the end of October 2020. Further, the  
125 relative size of two infection waves in England in 2020 estimated by our model, Spring wave  
126 from February to June and Autumn wave from September to November, were reversed  
127 compared those reported by the confirmed cases. The case detection rate relative to the  
128 total exposure was also dramatically different in these two-epidemic waves. If separating

129 the two waves from the first of August 2020, we found during January 2020 to August 2020  
130 the case detection rate was only 4.3% (95%CrI (4.1%, 4.6%)) which increased to 43.7%  
131 (95%CrI (40.7%, 47.3%)) during August 2020 to October 2020, highlighting the dominate  
132 effect of testing effort in shaping the case curve in the early stage of a pandemic. The testing  
133 issue, e.g. the limited capacity of tests and symptom-based testing strategy posted a big  
134 challenge for understanding the early pandemic. Viral surveys in the general population can  
135 solve the sampling issue, but still have the problem of not sampling early on. Serological  
136 data even from some convenient samples, e.g., blood donors can help to pin down the  
137 progress of the pandemic when antibody decay is teased out.

138

### 139 **Discussion**

140 Accurate reconstruction of exposure time series is necessary to assess how policies  
141 influenced transmission over time, in particular when reporting is lagged, and multiple  
142 interventions may have been undertaken in succession. For example, [21] made use of the  
143 comparison of exposure between general population and pregnant women in New York City  
144 to conclude the effectiveness of shielding during pregnancy. Moreover, the prior exposure  
145 level in the population can be used to inform future intervention design, e.g., vaccination  
146 prioritisation. For example, in the early stage of the COVID-19 vaccination campaign, when  
147 dose supply and administrative capacity were initially limited worldwide, a modelling study  
148 [22] explored how uncertainty about previous exposure levels and about a vaccine's  
149 characteristics affects the prioritization strategies for reducing deaths and transmission. This  
150 model showed use of individual-level serological tests to redirect doses to seronegative  
151 individuals improved the marginal impact of each dose while potentially reducing existing  
152 inequities in COVID-19 impact.

153

154 Here, we evaluated a simple dynamic model that we published previously and  
155 demonstrated its ability of reconstructing the first epidemic wave before large-scale survey  
156 sampling by providing robust estimates of exposure over time. One key element of the  
157 model was fitting model to serologic data that was generated from healthy adult blood  
158 donors supplied by the NHS Blood and Transplant (NHS BT collection) serum samples using  
159 the Euroimmun anti-spike IgG assay and reported in the Weekly national Influenza and  
160 COVID-19 surveillance report. This suggests that convenient samples, for example here

161 serum samples from blood donors have the promising power to provide primary  
162 information of epidemic progress in a short timeframe especially during the emergency of a  
163 new outbreak from a novel pathogen.

164

165 Because of the rigorous sampling design and robust estimation power ONS Covid Infection  
166 Survey can almost be seen as a golden standard for estimating community prevalence. Our  
167 model does not take any results or estimates from the survey as inputs, so the comparison  
168 exercise that we conducted here between estimates of exposure from our model with ONS  
169 Covid Infection Survey provides a real-world validation. Moreover, we showed the  
170 modelling approach is a valuable early pandemic diagnostic tool and can clearly recover the  
171 first epidemic wave that the survey was unable to capture because of late starting time.  
172 Using the inferred daily incidence, we explicitly demonstrated the variation of case  
173 detection rates over two epidemic waves in England in 2020. It provides quantitative  
174 information for studying the association between the capacity, behaviour, strategy of  
175 testing with the epidemic evolution and further supported the argument that confirmed  
176 cases largely underestimate the extent of disease transmission.

177

178 Moreover, the simple structure of the presented model avoids unnecessary complexity and  
179 structure-based uncertainty in a full dynamic model where compartmental models  
180 simulating the disease spread in different groups of population including susceptible,  
181 expose, infected and recovered are developed. The exercise of studying the model  
182 performance against data abundance suggests the modelling results remain highly robust in  
183 data sparse setting that is particularly important, for example, in Low- or Middle-Income  
184 Country (LMIC).

185

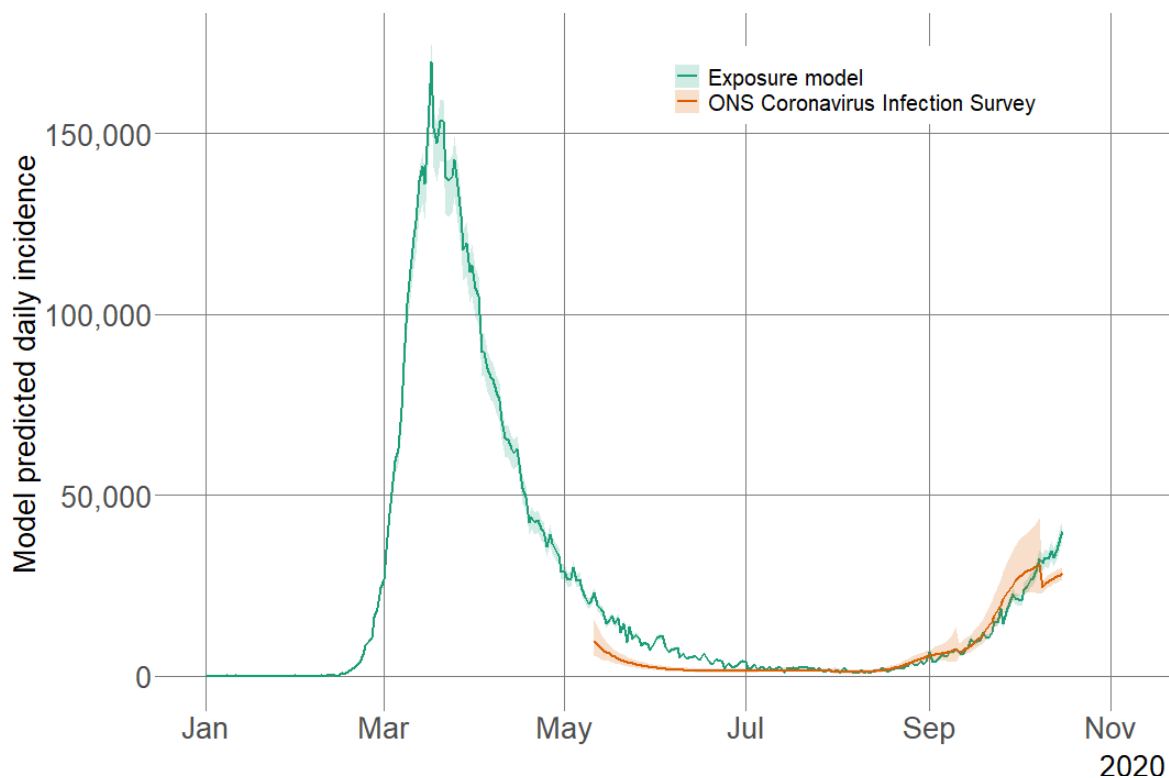

186

187 **Figure 1.** Comparison of model predicted daily incidence of SARS-CoV-2 in England. The  
188 green lines show the predictions of median daily incidence by our model [1] based on  
189 Equation (1) and (2) in the Materials and Methods section. The orange lines show the  
190 predictions of median daily incidence from ONS Coronavirus Infection Survey while the  
191 orange shaded areas correspond to the 95% CrI.

192

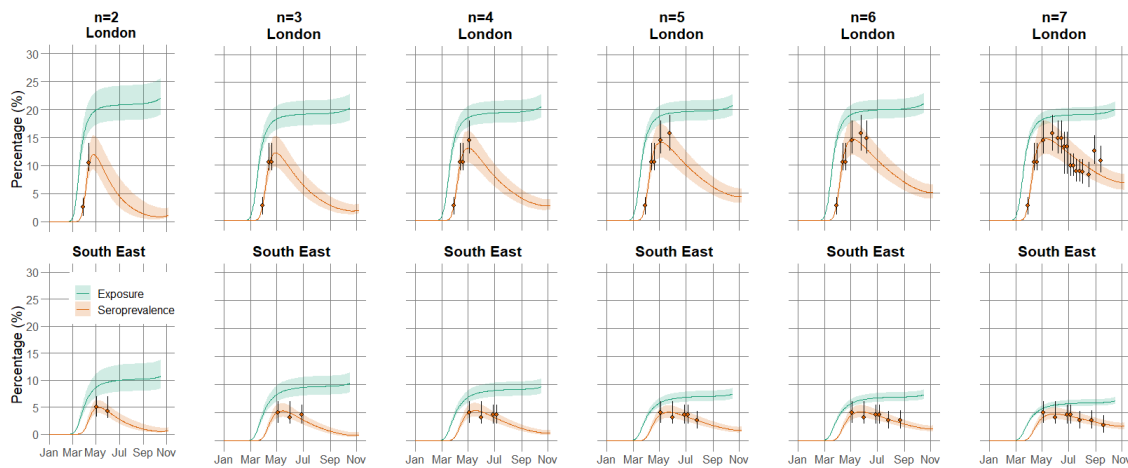

193

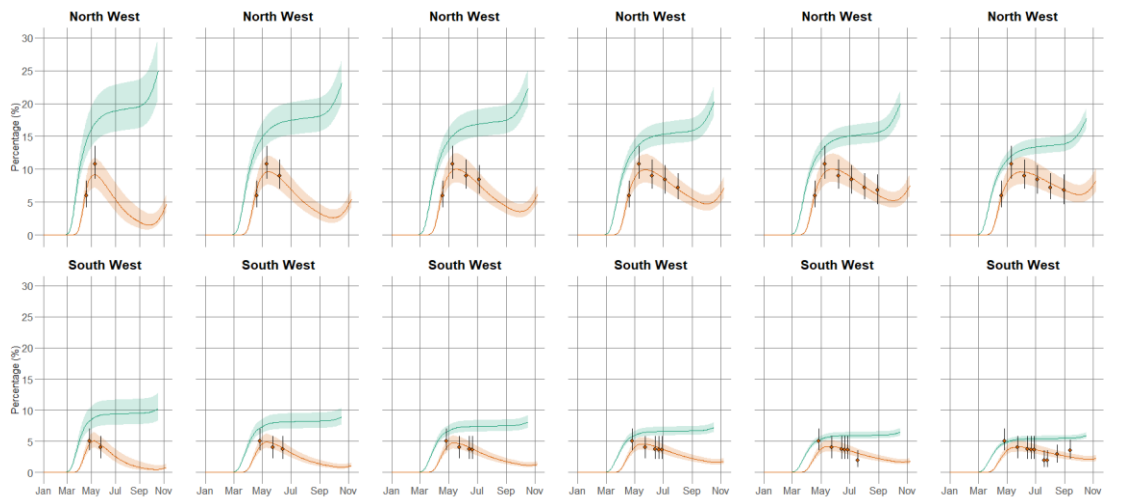

194

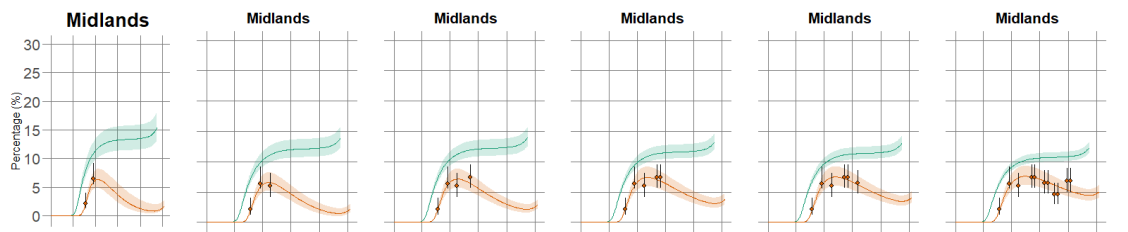

195

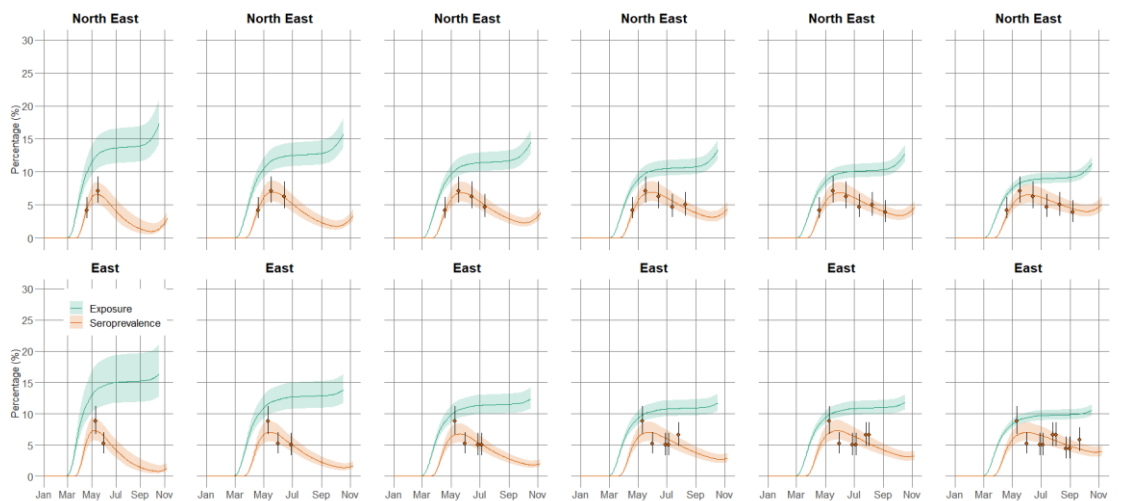

196



197 **Figure 2.** Comparison of estimates of exposure in seven regions of England as more  
198 serological measurements are given as model inputs (left to right). The green and orange  
199 lines show the model predictions of median exposure and seroprevalence, respectively,  
200 while the shaded areas correspond to the 95% CrI.  
201

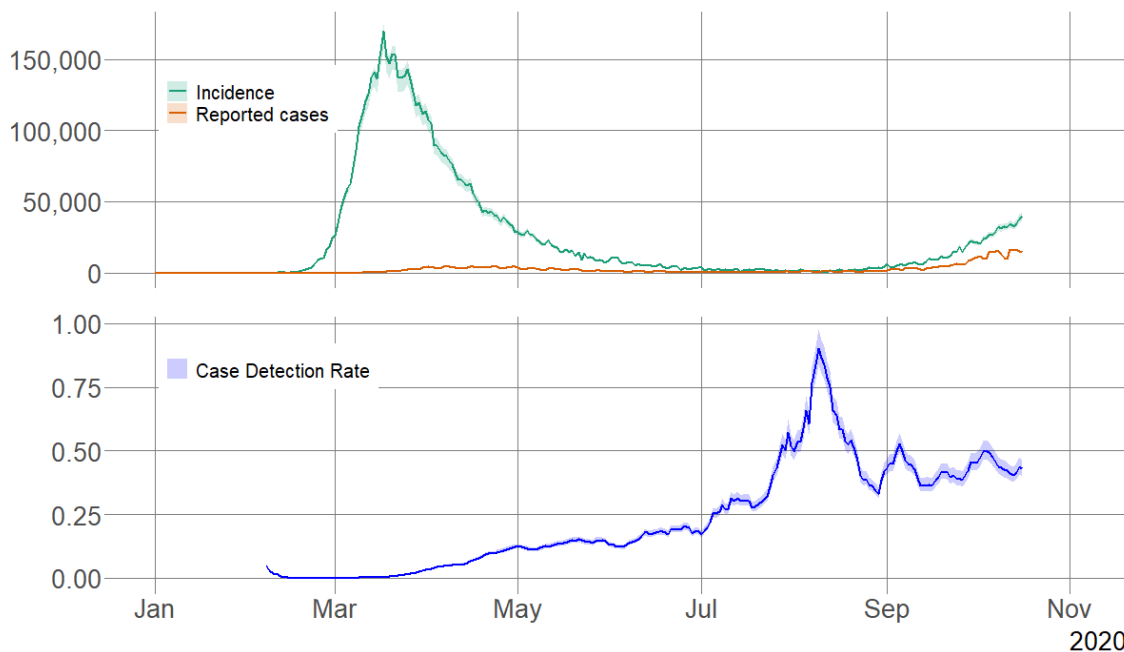

202  
203 **Figure 3.** Comparison between estimates of daily incidence with reported cases of SARS-  
204 CoV-2 in England and case detection rate. Here, all serological measurements were used in  
205 the model fitting. In the top figure, the green lines show the predictions of median daily  
206 incidence by our model based on Equation (1) and (2) in the Materials and methods section  
207 while the shaded areas correspond to the 95% CrI. The red lines show the reported  
208 confirmed cases in England downloaded from GUV.UK dashboard. In the bottom figure, the  
209 blue lines show the estimates of median case reporting rate in England based on Equation  
210 (3) and (4) while the shared areas correspond to the 95% CrI.

## 211

### 212 **Materials and methods**

#### 213 **Data sources**

214 We used publicly available epidemiological data to conduct the analysis, as described below.  
215 *ONS estimated incidence*  
216 Office for National Statistics (ONS) launched Coronavirus (COVID-19) Infection Survey in  
217 England on 26 April 2020 to estimate how many people across England, Wales, Northern

218 Ireland and Scotland would have tested positive for COVID-19 infection, regardless of  
219 whether they report experiencing symptoms that is one of the primary goals of the survey.  
220 The survey is based on a random sample of households to provide a nationally  
221 representative survey. Everyone aged 2 years and over in each household sample was asked  
222 to take a nose and throat swab for SARS-CoV-2 using reverse transcriptase polymerase chain  
223 reaction (RT-PCR). Every participant is swabbed once. they are then invited to have repeat  
224 tests every week for another four weeks and then monthly. More descriptions about the  
225 survey design can be found [23]. Using Bayesian multilevel generalised additive regression  
226 model to model the swab test result (positive or negative) as a function of age, sex, time,  
227 and region, the study estimated community prevalence of SARS-CoV-2 in England since April  
228 2020 [10]. Combine the estimates of community prevalence and estimates of duration of  
229 PCR testing positivity, the survey modelling team also published the estimates of daily  
230 incidence based on a deconvolution model [23].

231 To conduct the comparison of estimates of incidence between our model and ONS survey,  
232 we retrieved the SARS-CoV-2 daily incidence in England in 2020 from the Office for National  
233 Statistics (ONS) [11] on March 17, 2023 as shown in Figure 1.

234

### 235 *Model estimated exposure*

236 Cumulative exposure to SARS-CoV-2 in seven regions of England estimated by the model  
237 that we published before were obtained from [1]. Here, we firstly transformed and  
238 aggregated the cumulative exposure by region of England to daily incidence in England using  
239 Equation (1) and Equation (2).

240

### 241 *7-day average of reported COVID-19 cases in England*

242 7-day average of reported COVID-19 daily cases in England in 2020 were retrieved from the  
243 UK government's official COVID-9 online dashboard [12] on March 17, 2023 as shown in  
244 Figure 3.

245

## 246 **Method**

247 We firstly calculated the incidence in England estimated by exposure model [1] by  
248 computing the difference of cumulative exposure in two successive days and adding  
249 together to the whole England as shown in Figure 1 and Figure 3:

250

$$I_i(t) = E_i(t + 1) - E_i(t), t = 1, 2, \dots, n, i = 1, 2, \dots, 7$$

251  
252 *Equation (1)*

$$I_{England}(t) = \sum_{i=1}^7 I_i(t)$$

253  
254 *Equation (2)*

255 Here,  $E_i(t)$  is the daily exposure at region  $i$  estimated by exposure model [1],  $n$  is the total  
256 number of days from 1 January 2020 to 7 November 2020,  $i = 1, \dots, 7$  represents London,  
257 Southwest, Southeast, Northeast, Northwest, East, Midland.  $I_{England}(t)$  represents the  
258 daily incidence of England.

259 The 7-day average model predicted incidence can be calculated by

$$\bar{I}_{England}(t) = \frac{1}{7} \sum_{i=t-3}^{t+3} I_{England}(i), \quad t = 4, 5, \dots, n - 4$$

260  
261 *Equation (3)*

262 Here,  $t = 4$  refers to the fourth day of 2020,  $n$  is the end date of the comparison exercise,  
263 7 November 2020.

264 The estimated reporting ratio as shown in Figure 3 was calculated by

265

$$r(t) = \frac{\bar{I}_{England}(t)}{C(t)}$$

266  
267 *Equation (4)*

268 Here,  $C$  is the 7-day average reported cases in England from the UK government's official  
269 COVID-9 online dashboard [12].

270 While testing the relationship between model performance and data abundance in Figure 2,  
271 we firstly obtained all the data and codes from paper [1] and rerun the model by adding the  
272 seroprevalence measurements one by one into the model.

273

274 **Acknowledgments:** The authors received no financial support for the research.

275

276 **Author contributions:**

277 L.J.W., S.C, J.A.F, and K.A.L conceived and designed the study. S.C. cleaned the data, S.C. and  
278 L.J.W. developed the methodology and conducted the formal analysis. S.C. and L.J.W. wrote

279 the original manuscript. All authors reviewed and provided analytical input and approved  
280 the manuscript.

281

282 **Competing interests:** The authors have declared that no competing interests exist.

283

284 **Data and materials availability:** All codes and materials used in the analyses can be  
285 accessed at: [https://github.com/SiyuChenOxf/Exposure\\_ONS-modelling](https://github.com/SiyuChenOxf/Exposure_ONS-modelling). All parameter  
286 estimates and figures presented can be reproduced using the code provided. This work is  
287 licensed under a Creative Commons Attribution 4.0 International (CC BY 4.0) license, which  
288 permits unrestricted use, distribution, and reproduction in any medium, provided the  
289 original work is properly cited.

290

## 291 **References**

292

- 293 1. Chen, S., et al., *Levels of SARS-CoV-2 population exposure are considerably higher*  
294 *than suggested by seroprevalence surveys*. PLOS Computational Biology, 2021. **17**(9):  
295 p. e1009436.
- 296 2. Aburto, J.M., et al., *Quantifying impacts of the COVID-19 pandemic through life-*  
297 *expectancy losses: a population-level study of 29 countries*. International journal of  
298 epidemiology, 2022. **51**(1): p. 63-74.
- 299 3. Ozili, P.K. and T. Arun, *Spillover of COVID-19: impact on the Global Economy*, in  
300 *Managing Inflation and Supply Chain Disruptions in the Global Economy*. 2023, IGI  
301 Global. p. 41-61.
- 302 4. Metcalf, C.J.E., D.H. Morris, and S.W. Park, *Mathematical models to guide pandemic*  
303 *response*. Science, 2020. **369**(6502): p. 368-369.
- 304 5. Aguas, R., et al., *Modelling the COVID-19 pandemic in context: an international*  
305 *participatory approach*. BMJ global health, 2020. **5**(12): p. e003126.
- 306 6. Pagel, C. and C.A. Yates, *Role of mathematical modelling in future pandemic response*  
307 *policy*. bmj, 2022. **378**.
- 308 7. Bollyky, T.J., et al., *Pandemic preparedness and COVID-19: an exploratory analysis of*  
309 *infection and fatality rates, and contextual factors associated with preparedness in*  
310 *177 countries, from Jan 1, 2020, to Sept 30, 2021*. The Lancet, 2022. **399**(10334): p.  
311 1489-1512.
- 312 8. Kennedy, B., et al., *App-based COVID-19 syndromic surveillance and prediction of*  
313 *hospital admissions in COVID Symptom Study Sweden*. Nature Communications,  
314 2022. **13**(1): p. 2110.
- 315 9. Desjardins, M.R., *Syndromic surveillance of COVID-19 using crowdsourced data*. The  
316 Lancet Regional Health–Western Pacific, 2020. **4**.

- 317 10. Pouwels, K.B., et al., *Community prevalence of SARS-CoV-2 in England from April to*  
318 *November, 2020: results from the ONS Coronavirus Infection Survey*. The Lancet  
319 Public Health, 2021. **6**(1): p. e30-e38.
- 320 11. *Office of National Statistics Coronavirus (COVID-19) Infection Survey UK, 2023*  
321 [https://www.ons.gov.uk/peoplepopulationandcommunity/healthandsocialcare/cond](https://www.ons.gov.uk/peoplepopulationandcommunity/healthandsocialcare/conditionsanddiseases/bulletins/coronaviruscovid19infectionsurveypilot/latest#strengths-and-limitations)  
322 [itionsanddiseases/bulletins/coronaviruscovid19infectionsurveypilot/latest#strengqths-](https://www.ons.gov.uk/peoplepopulationandcommunity/healthandsocialcare/conditionsanddiseases/bulletins/coronaviruscovid19infectionsurveypilot/latest#strengths-and-limitations)  
323 [and-limitations](https://www.ons.gov.uk/peoplepopulationandcommunity/healthandsocialcare/conditionsanddiseases/bulletins/coronaviruscovid19infectionsurveypilot/latest#strengths-and-limitations). 2023.
- 324 12. GOV.UK. *Coronavirus (COVID-19) in the UK 2023*; Available from:  
325 [https://coronavirus.data.gov.uk/details/deaths?areaType=nation&areaName=Engla](https://coronavirus.data.gov.uk/details/deaths?areaType=nation&areaName=England)  
326 [nd](https://coronavirus.data.gov.uk/details/deaths?areaType=nation&areaName=England).
- 327 13. Clapham, H., et al., *Seroepidemiologic study designs for determining SARS-COV-2*  
328 *transmission and immunity*. Emerging Infectious Diseases, 2020. **26**(9): p. 1978.
- 329 14. Long, Q.-x., et al., *Antibody responses to SARS-CoV-2 in COVID-19 patients: the*  
330 *perspective application of serological tests in clinical practice*. MedRxiv, 2020: p.  
331 2020.03. 18.20038018.
- 332 15. Ibarondo, F.J., et al., *Rapid decay of anti-SARS-CoV-2 antibodies in persons with*  
333 *mild Covid-19*. New England Journal of Medicine, 2020. **383**(11): p. 1085-1087.
- 334 16. Wei, J., et al., *Anti-spike antibody response to natural SARS-CoV-2 infection in the*  
335 *general population*. Nature Communications, 2021. **12**(1): p. 6250.
- 336 17. Böger, B., et al., *Systematic review with meta-analysis of the accuracy of diagnostic*  
337 *tests for COVID-19*. American journal of infection control, 2021. **49**(1): p. 21-29.
- 338 18. Van Elslande, J., et al., *Estimated half-life of SARS-CoV-2 anti-spike antibodies more*  
339 *than double the half-life of anti-nucleocapsid antibodies in healthcare workers*.  
340 *Clinical Infectious Diseases*, 2021. **73**(12): p. 2366-2368.
- 341 19. Knock, E.S., et al., *Key epidemiological drivers and impact of interventions in the 2020*  
342 *SARS-CoV-2 epidemic in England*. Science Translational Medicine, 2021. **13**(602): p.  
343 eabg4262.
- 344 20. Russell, T.W., et al., *Reconstructing the early global dynamics of under-ascertained*  
345 *COVID-19 cases and infections*. BMC medicine, 2020. **18**(1): p. 1-9.
- 346 21. Chen, S., et al., *Estimating the effectiveness of shielding during pregnancy against*  
347 *SARS-CoV-2 in New York City during the first year of the COVID-19 pandemic*. Viruses,  
348 2022. **14**(11): p. 2408.
- 349 22. Bubar, K.M., et al., *Model-informed COVID-19 vaccine prioritization strategies by age*  
350 *and serostatus*. Science, 2021. **371**(6532): p. 916-921.
- 351 23. *Coronavirus (COVID-19) Infection Survey technical article: Cumulative incidence of*  
352 *the number of people who have tested positive for COVID-19, UK: 22 April 2022*.  
353 2020.
- 354
